# Supplementary material for: Isolation of Methane Enriched Bacterial Communities and Application as Wheat Biofertilizer under Drought Conditions: An Environmental Contribution
Source: MDPI journal article supplement (doi:10.3390/plants12132487), 2023-06-29
Supplement: s1 [file s1]

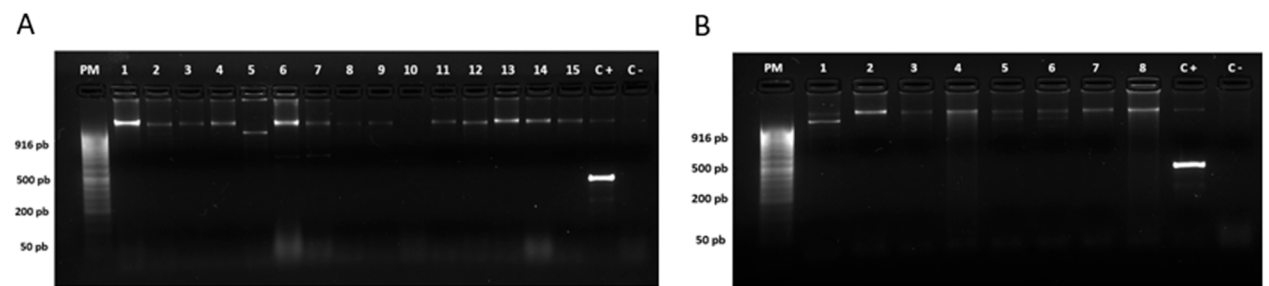

**Supplementary Figure S1:** Amplification of *pmoA* gene from non-methanotrophs isolates DNA by PCR.

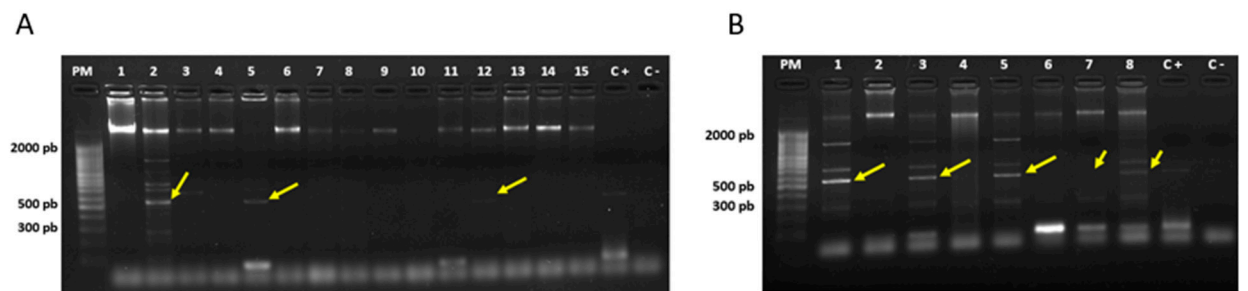

**Supplementary Figure S2:** Amplification of *mxoF* gene from non-methanotrophs isolates DNA by PCR.

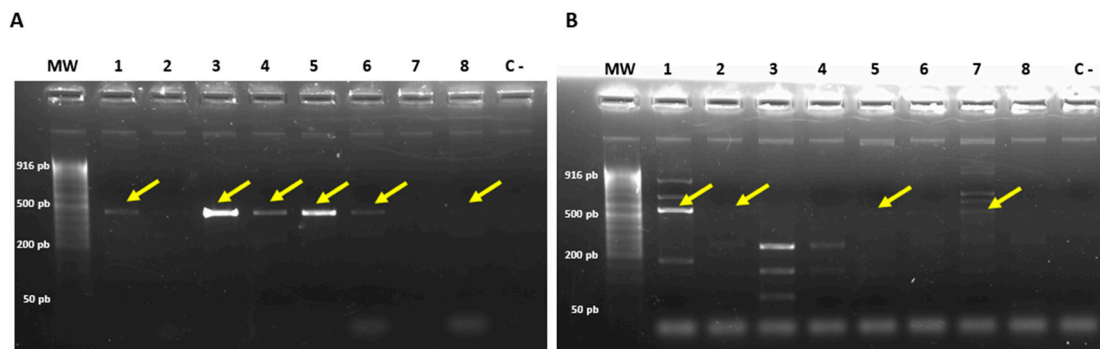

**Supplementary Figure S3:** Amplification of communities of methanotrophs and associated microorganisms DNA by PCR using specific oligonucleotides for *pmoA* (A) and *mxoF* (B) genes.
